# Supplementary material
Source: publisher site journal article supplement (https://www.physiology.org/docs/default-source/archive_tphys/the-physiologist-newsletter-1977-august-supplement.pdf?sfvrsn=fb5b13ca_2)
Supplement: Supplementary file 1 [file the-physiologist-newsletter-1977-august-supplement.pdf]

# Serving the needs of cell physiologists-

## American Journal of Physiology: Cell Physiology

**Editor:** P. Horowicz

**Associate Editors:** P. De Weer, H. A. Fozzard,  
F. J. Julian, C. F. Stevens, J. S. Willis, S. Winegrad

This new journal (first issue, January 1977) publishes original research articles in cellular and membrane physiology. Biological, chemical, and physical processes, as well as those concerned with physiological regulation and adaptation at the cellular and subcellular level, are covered. The journal also publishes research of a structural, biochemical, biophysical, comparative, or theoretical nature.

If you are working in any of the following areas, *American Journal of Physiology: Cell Physiology* should be considered as a publication tailored to your needs:

- permeability
- excitability
- receptor mechanisms
- muscle and nonmuscle motility
- excitation — contraction coupling
- membrane and transcellular transport
- synaptic transmission
- intercellular communication
- cellular energetics
- hormone action

Published bimonthly, in 2 volumes a year, the journal is printed in 8½ x 11" format, on top-grade coated paper, which gives the electron micrographs utmost clarity. A year's subscription costs \$30.00 in the U. S. and Possessions, \$33.00 in Canada, and \$35.00 elsewhere.

*For further information, or a sample copy, contact:*

The Editorial and Subscription Offices  
**American Journal of Physiology: Cell Physiology**

## The American Physiological Society

9650 Rockville Pike • Bethesda, MD 20014

# ILLUSTRATED LECTURES IN RENAL PHYSIOLOGY AND PATHOPHYSIOLOGY

FIVE NEW SLIDE & TAPE PROGRAMS FOR  
SELF INSTRUCTION AND/OR  
CLASSROOM PRESENTATION

Renal Physiology Course # 800

## New Lecture

809 Regulation of Renal  
Potassium Excretion \$65

The Complete Renal  
Pathophysiology Course # 900

Complete Course \$234

Contains 4/20 minute lectures,  
approximately 320 full color slides  
loaded in Kodak Carousels, and  
4 illustrated study guides.

901 Metabolic Acidosis \$65  
902 Hyponatremia \$65  
903 Edema \$65  
904 Disorders of  
Potassium Balance \$65

Each individual course contains 1/20  
minute cassette, 80 full color slides  
loaded in a Kodak Carousel, and an  
illustrated study guide.

FOR BROCHURE DETAILING ALL APS PROGRAMS  
send inquiries to:

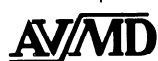

AUDIO VISUAL MEDICAL MARKETING INC.  
850 THIRD AVENUE, NY, NY 10022  
or call (212) 421-6900

AMERICAN PHYSIOLOGICAL SOCIETY

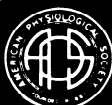

# CELL CONTROLS

a short course

October 27-30, 1977

AT THE  
MARINE BIOLOGICAL LABORATORY  
Woods Hole, Massachusetts

Falling behind on the literature? Come and  
revive with us!

In this tranquil, oceanside setting, nine  
distinguished scientists will present an up-  
to-date account of developments concern-  
ing a broad range of basic cellular control  
mechanisms.

- Membranes and junctions
- Motility
- Machinery of division
- Control of division
- Receptors and signals
- Communication
- Immune system
- Malignant transformation
- Differentiation
- Tissue assembly

Informal atmosphere; good meals; com-  
fortable accommodations; ample provi-  
sion for discussions and personal contact  
with faculty and participants.

Enrollment is limited to 32 subscribers.

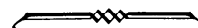

For complete information write:

**Cell Controls**  
Faculty Associates Inc.  
14 Gordon Way  
Princeton, N.J. 08540.  
or call 609-921-3152.

American Physiological Society

# Disturbances in Body Fluid Osmolality

Edited by Thomas E. Andreoli,  
Jared J. Grantham, and  
Floyd C. Rector, Jr.

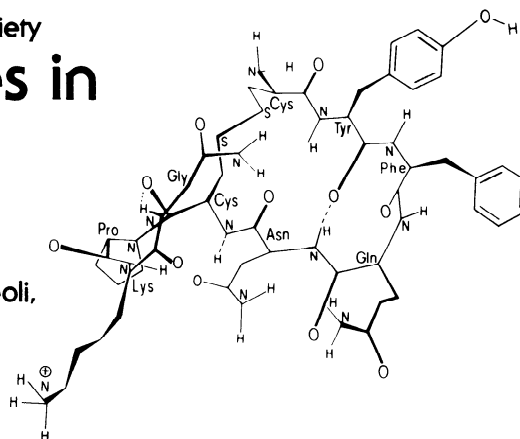

The fifteen, peer-reviewed papers included in this innovative study will provide clinicians with a more rational framework for evaluating and treating body fluid imbalance. A wealth of information is presented here in a succinct but easily assimilated style.

**Disturbances in Body Fluid Osmolality** encompasses the enormous increase in information on the role and mechanism of antidiuretic hormone (ADH) in regulating the osmolality and volume of body fluid compartments and in the measurements of plasma ADH levels in health and sickness.

The benefit of the insight and experience of the thirty-two contributors to this volume has been arranged into four sections

**Molecular Aspects of Antidiuretic Hormone Action** covering:

- Recent information on the chemistry and conformation of ADH and related compounds
- Data on the location and possible nature of hormone receptors in the renal collector duct
- Current views and hypotheses about the molecular mechanisms by which ADH increases water and solute transport across renal collecting tubules and related epithelia

**Antidiuretic Hormone and Body Water Homeostasis** including:

- Recent advances in the measurement of ADH concentrations in the interrelationships between osmotic and non-osmotic stimuli in regulating ADH release
- Recent advances in the measurement of ADH concentrations in the renal mechanisms for forming dilute or concentrated urine

**Pathophysiology of Disturbed Water Homeostasis** containing:

- Insights, derived from animal models, into conditions occurring at the hypothalamic level or within the renal tubule that serve as excellent analogues for the various types of diabetes insipidus observed in clinical practice.
- Insights into the cellular pathophysiology referable to osmotic dilution or concentration of body fluids

**Clinical Derangements in Water Homeostasis** presenting:

- An approach to the classification of clinical disorders of body water homeostasis, with particular regard to the diagnosis and explicit management of these diseases

The breadth of content in this exceptional study will make it a primary reference for anyone concerned with those processes that contribute to the regulation of body fluid osmolality and a useful sourcebook for the clinician faced with the evaluation, diagnosis, and management of patients afflicted with derangements in body water homeostasis.

1977/357 pages /illustrated \$25.00

Distributed for the American Physiological Society by  
Williams & Wilkins, 428 E. Preston St., Baltimore, Md. 21202

# IUPS WORLD DIRECTORY OF PHYSIOLOGISTS

## FIRST EDITION

### A NEW IUPS SERVICE TO THE WORLD COMMUNITY OF PHYSIOLOGISTS

The first edition of the *IUPS World Directory of Physiologists* results from an initial effort by the IUPS in 1977 to obtain from every IUPS National Member Society the name and address of each of their members together with their specialty and year of election to the society. Included is a listing of elected officers for each reporting society. The 224-page directory also provides a history of the IUPS as well as listings of IUPS officers, committees, commissions, and national committee representatives. This first international directory of physiologists should be most useful to institutions and individual scientists.

To order your copy please complete the order form and send it to the address given, together with the appropriate remittance in U.S. dollars.

*Price for the World Directory.* \$6.50 (U.S.) to individual members of IUPS member societies. \$15.00 (U.S.) to non-member individuals and institutions. IUPS member societies may obtain multiple copies (20 or more) at \$5.00 (U.S.) per copy.

*Orders from North and South America* should be directed to **IUPS World Directory**, 9650 Rockville Pike, Bethesda, Maryland 20014, USA. *Orders from other countries* should be directed to Professor K. Thureau, Department of Physiology, Pettenkoferstrasse 12, 8000 Munich 2, Federal Republic of Germany.

*Mode of payment.* Checks should be made payable to **IUPS World Directory** and should accompany the order form or a bank transfer should be made to **IUPS World Directory**, Bayerische Hypotheken-Wechselbank, Munich. Account no: M/Sr 183051180.

---

### ORDER FORM

Please send me \_\_\_\_\_ copies of the first edition of the *IUPS World Directory*

I enclose a check for \_\_\_\_\_ U.S. dollars

I have transferred \_\_\_\_\_ U.S. dollars to the *IUPS World Directory* account

Please mark one of the following:

☐ I am a member of the IUPS following member society \_\_\_\_\_

☐ I am a nonmember individual      ☐ a nonmember organization

The directory should be mailed to the following address:

(Please **print or type** name and complete mailing address in the space above.)

This book presents a series of articles based on presentations during a five day colloquium at the spring, 1976 meeting of The Federation of Societies for Experimental Biology. Sponsored by The American Physiological Society, the program was planned as a collaborative effort of **seven biomedical societies** and featured 33 presenters, 10 of them from abroad.

More than the usual symposium proceedings volume, this book has provided the participants the opportunity to summarize the present knowledge in this most fundamental area. **The contents range from statesman-like overviews of organ systems and molecular properties to the latest techniques.** Thus a truly profound and far-ranging summary is presented of the state of our understanding and of the advancing edge of the field.

## OXYGEN & PHYSIOLOGICAL FUNCTION

Edited by Frans F. Jöbsis Ph.D.

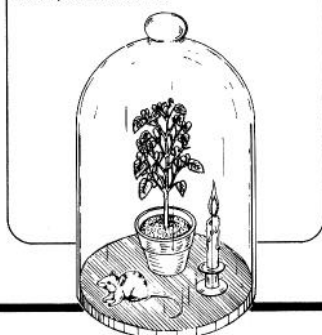

# OXYGEN & PHYSIOLOGICAL FUNCTION

Edited by Frans F. Jöbsis

550 pages  
Over 300 illus. plus tables

## A COLLABORATIVE EFFORT OF SEVEN BIOMEDICAL SOCIETIES

THE AMERICAN PHYSIOLOGICAL SOCIETY

THE SOCIETY OF GENERAL PHYSIOLOGISTS

THE INTERNATIONAL SOCIETY FOR OXYGEN TRANSPORT TO TISSUE

THE AMERICAN SOCIETY FOR PHARMACOLOGY AND EXPERIMENTAL THERAPEUTICS

THE AMERICAN SOCIETY OF BIOLOGICAL CHEMISTS

THE AMERICAN SOCIETY FOR EXPERIMENTAL PATHOLOGY

THE BIOPHYSICAL SOCIETY

### OVERVIEW

PROBLEMS OF O<sub>2</sub> DELIVERY AND CO<sub>2</sub> CLEARANCE IN METAZOA

P. Dejours

MOLECULAR BASIS OF O<sub>2</sub> AFFINITY FOR CYTOCHROME OXIDASE

B. Chance

SPECIAL ASPECTS OF PLANT RESPIRATION

W. D. Bonner, Jr.

ENERGY CONSERVATION IN THE RESPIRATORY CHAIN

E. C. Slater

KINETIC BEHAVIOUR OF AN INTERMEDIATE OF CYTOCHROME C OXIDASE

E. Antonini, M. Brunori, A. Colosimo, C. Greenwood, M. Wilson

### SPECIAL METHODS

MEASURING METHODS FOR THE ANALYSIS OF TISSUE OXYGEN SUPPLY

D. W. Lübbers

FORMAL ASPECTS OF TISSUE SPECTROPHOTOMETRY

R. Wodick

A RAPID SCANNING SPECTROPHOTOMETER AND FLUOROMETER FOR *IN VIVO* MONITORING OF STEADY-STATE AND KINETIC OPTICAL PROPERTIES OF RESPIRATORY ENZYMES

L. J. Mandel, T. G. Riddle, J. C. LaManna

ORIGIN OF LABILE NADH TISSUE FLUORESCENCE

M. J. O'Connor

In collaboration with: F. Welsh, L. Komarnicky, T. Davis, J. Stevens, D. Lewis, and C. Herman  
TWO- AND THREE-DIMENSIONAL ANALYSIS ON BRAIN OXYGEN DELIVERY

B. Quistorff, B. Chance

EFFECTS OF MICROCIRCULATION ON MICROFLUOREMETRIC MEASUREMENTS

A. G. B. Kovách, E. Dóra, A. Eke, L. Gyulai

THE DETERMINATION OF OXYGEN AVAILABILITY IN THE MICROCIRCULATION

R. N. Pittman, B. R. Duling

OXYGEN MICROELECTRODE FOR TISSUE STUDIES

W. J. Whalen

PYRENEBUTYRIC ACID, A FLUORESCENT PROBE FOR THE MEASUREMENT OF INTRACELLULAR OXYGEN

I. S. Longmuir, J. A. Knopp, M. H. Mitnick

### OXYGEN TRANSPORT AND ITS REGULATION

SOME MOLECULAR ADAPTATION OF HEMOGLOBIN FOR OXYGEN TRANSPORT IN VERTEBRATES

A. Riggs

NON-HEME OXYGEN TRANSPORT PROTEINS

J. Bonaventura, C. Bonaventura, B. Sullivan

MOLECULAR REQUIREMENTS FOR SYNTHETIC OXYGEN CARRIERS

T. G. Traylor

FACILITATION OF OXYGEN DIFFUSION BY INTRACELLULAR LEGHEMOGLOBIN AND MYOGLOBIN

J. B. Wittenberg

SEARCH FOR ALTERNATIVE CELLULAR OXYGEN CARRIERS

I. S. Longmuir

QUANTITATIVE MEASUREMENT AND DESCRIPTION OF OXYGEN SUPPLY TO THE TISSUE

D. W. Lübbers

INJURY BY AND ADAPTATION TO LOW AND HIGH PO<sub>2</sub>: THE CELLULAR PATHOLOGY OF HYPOXIC, ISCHEMIC INJURIES: ULTRASTRUCTURE

J. H. Garcia

IN VIVO ADAPTATION OF O<sub>2</sub> UTILIZATION TO O<sub>2</sub> AVAILABILITY: COMPARISON OF ADULT AND NEWBORN MITOCHONDRIA

L. Mela, C. W. Goodwin, L. D. Miller

VARIATION ON A THEME BY EMBDEN, MEYERHOF, AND PARNAS

P. W. Hochachka, M. Guppy

EXPERIMENTAL PATHOLOGY OF OXYGEN TOXICITY

J. D. Balentine

SUPEROXIDE AND SUPEROXIDE DISMUTASE IN OXYGEN TOXICITY

J. M. McCord

GLUTATHIONE RELEASE, AN INDICATOR OF HYPEROXIC STRESS

B. Chance, K. Nishiki, N. Oshino

OXYGEN AND SPECIALIZED FUNCTIONS: MYOCARDIAL PHYSIOLOGY / ION TRANSPORT

CONTROL OF THE MYOCARDIAL MICROCIRCULATION

R. M. Berne, R. Rubio

PHARMACOLOGICAL MANIPULATION OF OXYGEN BALANCE IN THE MYOCARDIUM

G. J. Gross, D. C. Wartier, H. F. Hardman

ADAPTATION OF THE MYOCARDIAL CIRCULATION TO ALTERED O<sub>2</sub> STATES

C. M. Bloor

MYOCARDIAL ION TRANSPORT IN HYPOXIA AND ISCHEMIA

G. E. Lindenmayer, R. G. Steen, W. H. Newman

RESPIRATORY CHAIN FUNCTION AND ION TRANSPORT IN EPITHELIA

L. J. Mandel

OXYGEN AND SPECIALIZED FUNCTIONS: NEURONAL ACTIVITY

BRAIN METABOLISM IN RELATION TO OXYGEN SUPPLY

B. K. Siesjö, C. H. Nordström

CEREBRAL OXYGEN AND GLUCOSE METABOLISM DURING SEIZURES

F. Plum, T. E. Duffy, R. C. Collins

MOLECULAR PATHOLOGY OF LIPIDS IN CNS MEMBRANES

H. Demopoulos, E. Flamm, M. Seligman, R. Power,

D. Pietronigro, J. Ransohoff

SUFFICIENCY OF OXYGEN SUPPLY FOR SUSTAINING BRAIN ACTIVITY: ON THE ISCHEMIC THRESHOLDS OF CEREBRAL BLOOD FLOW

J. Astrup, L. Symon, N. M. Branston, N. A. Lassen

OXIDATIVE METABOLISM AND ELECTROPHYSIOLOGICAL ACTIVITY IN INTACT CENTRAL NERVOUS SYSTEM

M. Rosenthal, J. C. LaManna

CORTICAL OXIDATIVE METABOLISM FOLLOWING MICROANASTOMOSIS FOR BRAIN ISCHEMIA

G. Austin, G. Huagen, J. LaManna

FUNCTIONAL CORRELATES WITH TISSUE PO<sub>2</sub> IN THE CAROTID BODY

W. J. Whalen, P. Nair

## OXYGEN AND PHYSIOLOGICAL FUNCTION Edited by F. F. Jöbsis

Special offer to F.A.S.E.B. members only . . . \$22.50 + \$2.25 postage & handling

Make your check payable to: Professional Information Library, Dept. 3B 1616 Hi-Line Drive, Dallas, TX 75207
